# Supplementary material for: Evaluation of CHROMagar™ LIN-R for the Screening of Linezolid Resistant Staphylococci from Positive Blood Cultures and Nasal Swab Screening Samples
Source: MDPI journal article supplement (doi:10.3390/antibiotics11030313), 2022-02-25

# Evaluation of CHROMagar™ LIN-R for the screening of linezolid resistant *Staphylococci* from positive blood cultures and nasal swab screening samples

## SUPPLEMENTARY FIGURES

**Supplementary Figure S1.** Image of the growth on CHROMagar™ LIN-R after 48h incubation at 37°C of a pure culture of A. linezolid resistant (LZD<sup>R</sup>) *S. epidermidis* 1), *S. aureus* 2), and *E. faecium* 3), versus B. the artifactual effect of inoculum observed with (LZD<sup>S</sup>) *S. epidermidis* 4), *S. aureus* 5) and *E. faecium* 6).

**A.**

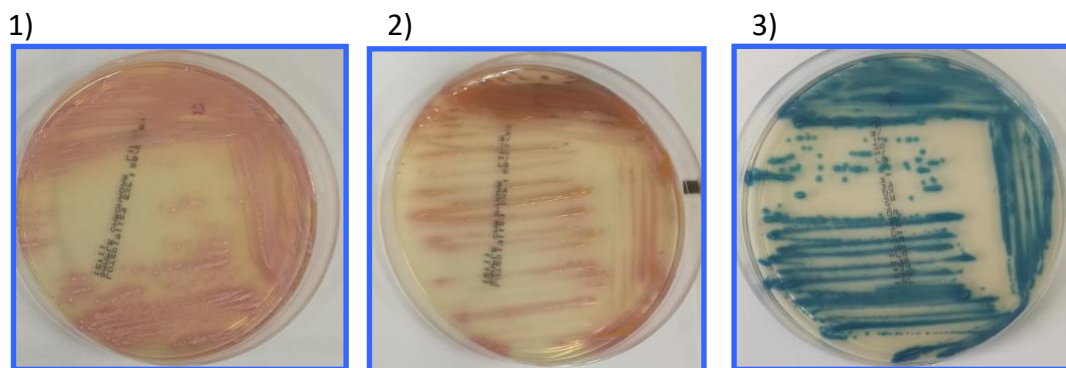

**B.**

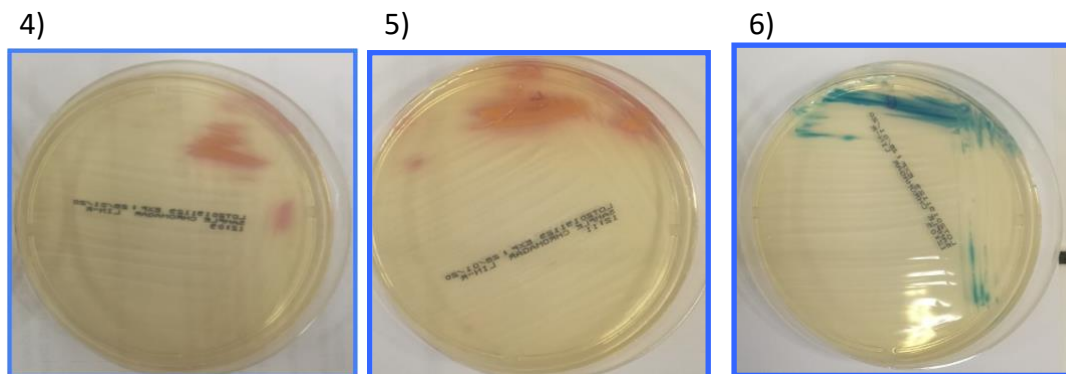

**Supplementary Figure S2.** CHROMagar™ LIN-R medium plated with positive blood culture spiked with LZD<sup>S</sup> *S. epidermidis* after 24h of incubation.

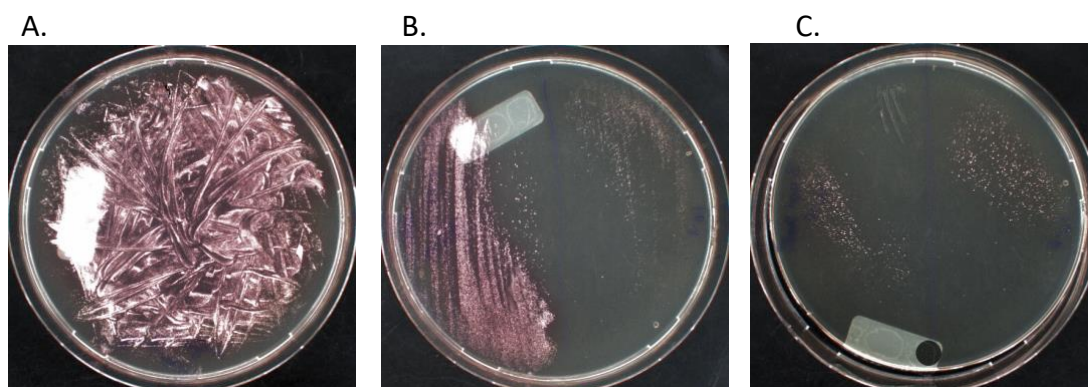

**Supplementary Figure S3.** Determination of the artifactual inoculum effect observed with 10  $\mu$ l of a pure culture of a linezolid susceptible *S. epidermidis* isolate (A) 0.5 McFarland ( $\sim 10^6$  CFU), (B) dilutions in sterile water at  $10^{-1}$  ( $\sim 10^5$  CFU) and  $10^{-2}$  ( $\sim 10^4$  CFU), C.  $10^{-3}$  ( $\sim 10^3$  CFU) and  $10^{-4}$  ( $\sim 10^2$  CFU).

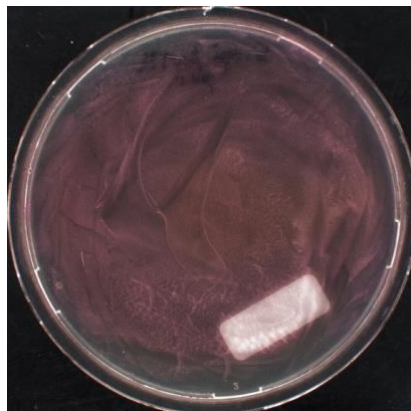

Supplement: s1 [file s1]
